# Supplementary material for: Metabolomic Profiling Revealed Diversion of Cytidinediphosphate-Diacylglycerol and Glycerol Pathway towards Denovo Triacylglycerol Synthesis in Rhodosporidium toruloides
Source: MDPI journal article supplement (doi:10.3390/jof7110967), 2021-11-13
Supplement: s1 [file s1]

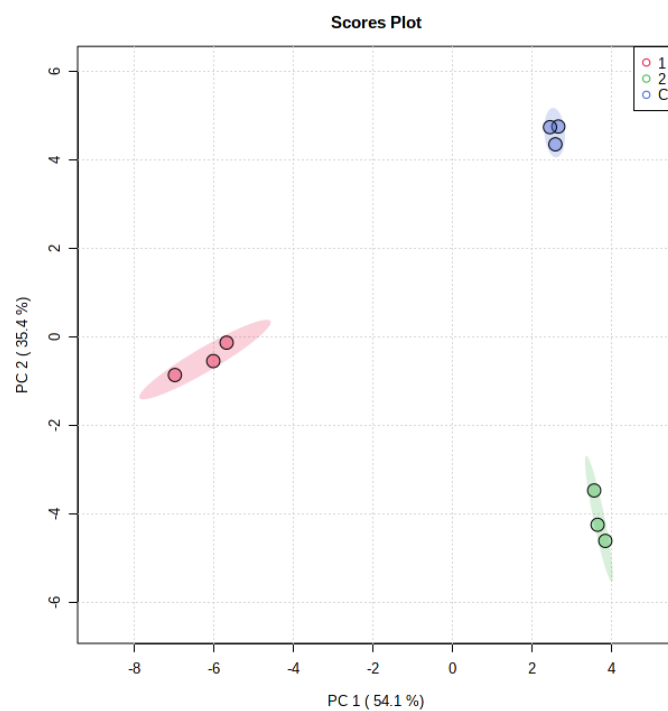

**Figure S1.** Two-dimensional principal component analysis (PCA) score plot to depict the variation among the metabolic profile of *R. toruloides* under different glucose and nitrogen percentage. C: control [3 % glucose, 0.5 % (NH<sub>4</sub>)<sub>2</sub>SO<sub>4</sub>], 1: N-limited [5 % glucose, 0.12 % (NH<sub>4</sub>)<sub>2</sub>SO<sub>4</sub>], 2: N sufficient [5 % glucose, 0.5 % (NH<sub>4</sub>)<sub>2</sub>SO<sub>4</sub>]
