# Supplementary material for: Metabolomic Profiling Revealed Diversion of Cytidinediphosphate-Diacylglycerol and Glycerol Pathway towards Denovo Triacylglycerol Synthesis in Rhodosporidium toruloides
Source: MDPI journal article supplement (doi:10.3390/jof7110967), 2021-11-13
Supplement: s1 [file s1]

**Table S1:** Comparative study of DCW (g/L), lipid titer (g/L) and glucose consumption (g/L) of *R. toruloides* at different time interval on various glucose concentration (0.5 % (NH<sub>4</sub>)<sub>2</sub>SO<sub>4</sub>)

|                  | 3 %         |                   |                        | 4 %         |                   |                        | 5 %         |                   |                        | 6 %           |                   |                        |
|------------------|-------------|-------------------|------------------------|-------------|-------------------|------------------------|-------------|-------------------|------------------------|---------------|-------------------|------------------------|
| Day              | DCW (g/L)   | Lipid titer (g/L) | Residual glucose (g/L) | DCW (g/L)   | Lipid titer (g/L) | Residual glucose (g/L) | DCW (g/L)   | Lipid titer (g/L) | Residual glucose (g/L) | DCW (g/L)     | Lipid titer (g/L) | Residual glucose (g/L) |
| 5 <sup>th</sup>  | 6.60 ± 0.16 | 3.30 ± 0.04       | 5.85 ± 0.071           | 5.2 ± 0.19  | 3.1 ± 0.20        | 17.34 ± 0.25           | 5.5 ± 0.06  | 3.1 ± 0.04        | 19.55 ± 0.087          | 6.44 ± 0.11   | 3.12 ± 0.14       | 37.08 ± 0.27           |
| 6 <sup>th</sup>  | 6.80 ± 0.18 | 3.40 ± 0.08       | 1.67 ± 0.005           | 5.5 ± 0.32  | 3.48 ± 0.18       | 10.16 ± 0.35           | 5.7 ± 0.08  | 3.48 ± 0.15       | 12.48 ± 0.056          | 7.15 ± 0.28   | 4.27 ± 0.36       | 29.35 ± 0.34           |
| 7 <sup>th</sup>  | 6.66 ± 0.12 | 3.23 ± 0.05       | 0.013 ± 0.004          | 7.6 ± 0.18  | 3.66 ± 0.16       | 8.23 ± 0.28            | 7.8 ± 0.05  | 4.64 ± 0.009      | 9.44 ± 0.062           | 9.26 ± 0.23   | 4.16 ± 0.34       | 18.61 ± 0.25           |
| 8 <sup>th</sup>  | 6.53 ± 0.08 | 2.13 ± 0.06       | 0                      | 8.20 ± 0.15 | 4 ± 0.007         | 2.58 ± 0.006           | 9.6 ± 0.12  | 5.8 ± 0.08        | 4.26 ± 0.007           | 10.4 ± 0.28   | 5.3 ± 0.12        | 10.29 ± 0.004          |
| 9 <sup>th</sup>  | -           | -                 | -                      | 8.19 ± 0.18 | 4.02 ± 0.005      | 3.18 ± 0.23            | 9.50 ± 0.14 | 5.7 ± 0.068       | 3.72 ± 0.048           | 10.35 ± 0.045 | 3.3 ± 0.18        | 5.6 ± 0.07             |
| 10 <sup>th</sup> | -           | -                 | -                      | 8.20 ± 0.26 | 3.99 ± 0.08       | 1.96 ± 0.24            | 9.38 ± 0.09 | 5.2 ± 0.054       | 2.18 ± 0.069           | 10.17 ± 0.34  | 3.2 ± 0.04        | 5.12 ± 0.05            |

At 3 % Glucose, 0.5 % (NH<sub>4</sub>)<sub>2</sub>SO<sub>4</sub> i.e. control maximum lipid is produced at 6<sup>th</sup> day (144 h) while for other conditions as the glucose concentration increases in the medium; glucose consumption rate decreases and time of lipid accumulating phase increases up to 8<sup>th</sup> day (192 h). 8<sup>th</sup> day (192 h). Hence, lipid accumulating phase is different for control (144 h) and other glucose concentration condition i.e. 192 h.

Similarly, for N- sufficient [5 % Glucose, 0.5 % (NH<sub>4</sub>)<sub>2</sub>SO<sub>4</sub>] and N- limited [5 % Glucose, 0.12 % (NH<sub>4</sub>)<sub>2</sub>SO<sub>4</sub>] maximum lipid is produced at 8<sup>th</sup> day (192 h). Hence, lipid accumulating phase is different for control (144 h) and N-sufficient (192 h) as well as N-limited (192 h) condition
